# Supplementary material
Source: PubMed Central journal article supplement (PMC2606906)

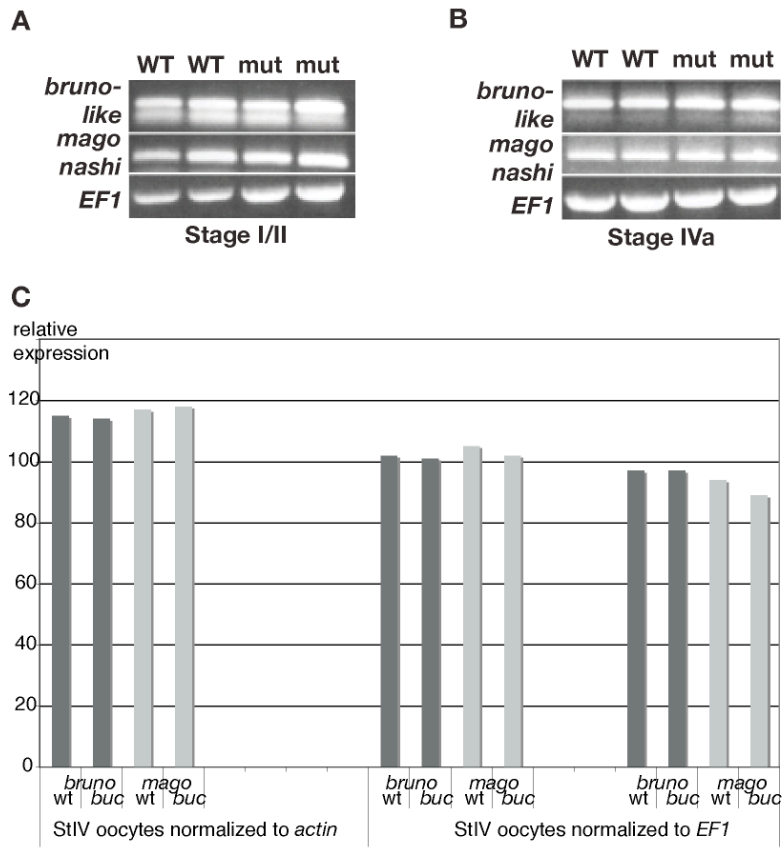

**Supplemental Figure 1**

Supplement: NIHMS67550-supplement-01.pdf [file NIHMS67550-supplement-01.pdf]
